# Supplementary material for: Siraitia grosvenorii Extract Attenuates Airway Inflammation in a Murine Model of Chronic Obstructive Pulmonary Disease Induced by Cigarette Smoke and Lipopolysaccharide
Source: MDPI journal article supplement (doi:10.3390/nu15020468), 2023-01-16
Supplement: s1 [file s1]

Supplementary Figure S1. Raw data of western blots for Figure 2.

A

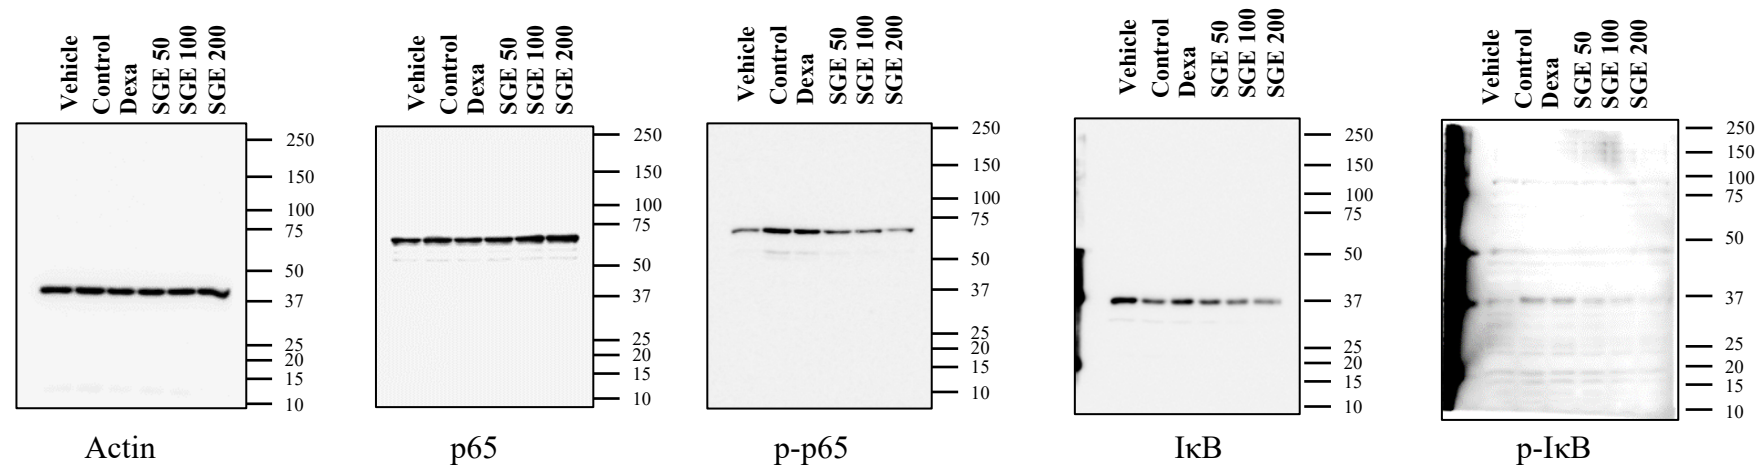

B

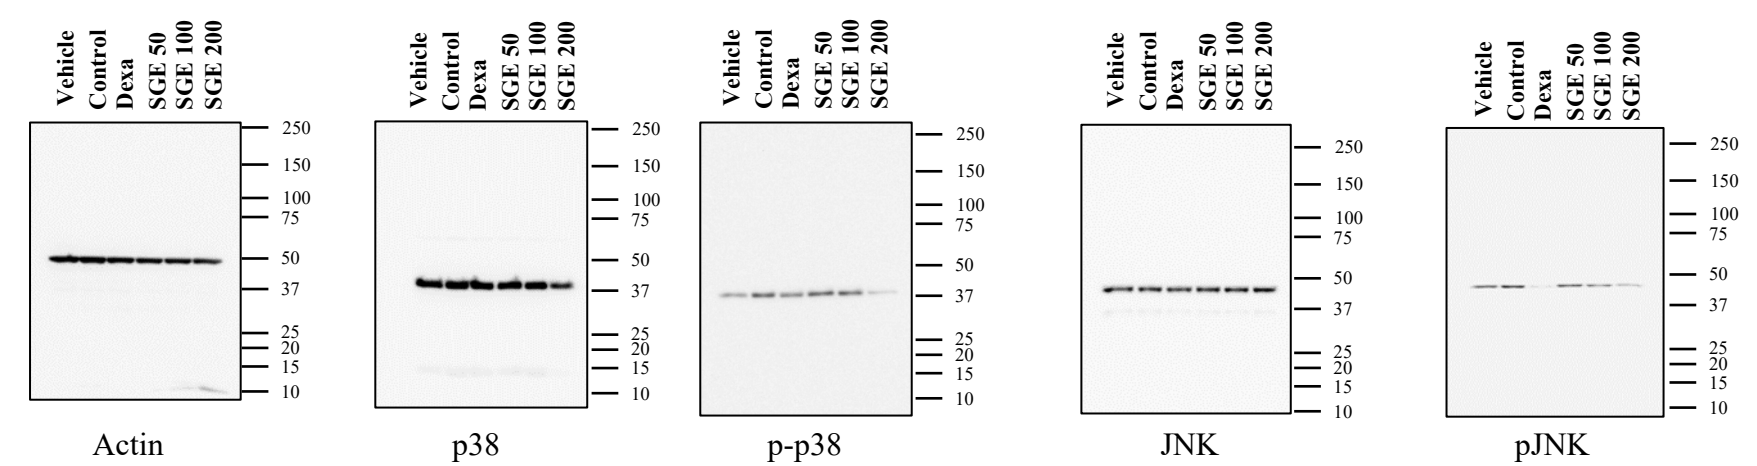

**Supplementary Table S1.** Primers sequence used in qRT-PCR analysis.

| Gene           | Primer | Oligonucleotide Sequence (5'-3') |
|----------------|--------|----------------------------------|
| hActin         | F      | GCGGGAAATCGTGCGTGACA             |
|                | R      | GATGGAGTTGAAGGTAGTTT             |
| hIL-1 $\beta$  | F      | ACGCTCCGGGACTCACAGCA             |
|                | R      | TGAGGCCCAAGGCCACAGGT             |
| hIL-6          | F      | AGAGTAGAGGAACAAGCC               |
|                | R      | TACATTTGCCGAAGAGCCCT             |
| hIL-8          | F      | CTCTTGGCAGCCTTCCTGATT            |
|                | R      | ACTCTCAATCACTCTCAGTTC            |
| hIL-17         | F      | TCAACCCGATTGTCCACCAT             |
|                | R      | GAGTTTAGTCCGAAATGAGGC            |
| hCXCL1         | F      | GAAAGCTGCCTCAATCCTG              |
|                | R      | CTTCCTCCTCCCTTCTGGTC             |
| hTNF- $\alpha$ | F      | GCCCAGGCAGTCAGATCATCT            |
|                | R      | TTGAGGGTTTGCTACAACATG            |
| hIRAK1         | F      | TCAGCTTTGGGGTGGTAGTG             |
|                | R      | TAGATCTGCATGGCGATGGG             |
| mActin         | F      | TGGAATCCTGTGGCATCCAT             |
|                | R      | TAAAACGCAGCTCGTAACAG             |
| mTNF- $\alpha$ | F      | CCTGTAGCCACGTCGTAGC              |
|                | R      | TTGACCTCAGCGCTGAGTTG             |
| mMIP-2         | F      | ATGCCTGAAGACCCTGCCAAG            |
|                | R      | GGTCAGTTAGCCTTGCCTTTG            |
| mCXCL-1        | F      | CCGAAGTCATAGCCACAC               |
|                | R      | GTGCCATCAGAGCAGTCT               |
| mMUC5AC        | F      | AGAATATCTTTCAGGACCCCT            |
|                | R      | ACACCAGTGCTGAGCATACTT            |
| mTRPV1         | F      | CATCTTCACCACGGCTGCTTAC           |
|                | R      | CAGACAGGATCTCTCCAGTGAC           |
| mTRPA1         | F      | TGAGATCGACCGGAGT                 |
|                | R      | TGCTGAAGGCATCTTG                 |
